# Supplementary material for: How Individual Variations in the Perception of Basic Tastes and Astringency Relate with Dietary Intake and Preferences for Fruits and Vegetables
Source: MDPI journal article supplement (doi:10.3390/foods10081961), 2021-08-23
Supplement: s1 [file s1]

[illegible]

| Product vegetable/<br>Fruit | Never<br>or less<br>than 1<br>time per<br>month | 1 time<br>per<br>month   | 2<br>times<br>per<br>month  | 3<br>times<br>per<br>month | 1 time<br>per<br>week    | 2 to 4<br>times per<br>week | 5 to 6<br>times per<br>week | 1 time<br>per<br>day     | More than<br>1 time<br>per day | Seasonal<br>consump<br>tion | Hate                     | Don't like               | Neutral                  | Like                     | Love                     |
|-----------------------------|-------------------------------------------------|--------------------------|-----------------------------|----------------------------|--------------------------|-----------------------------|-----------------------------|--------------------------|--------------------------------|-----------------------------|--------------------------|--------------------------|--------------------------|--------------------------|--------------------------|
|                             |                                                 |                          |                             |                            |                          |                             |                             |                          |                                |                             | 1                        | 2                        | 3                        | 4                        | 5                        |
| Avocado                     | <input type="checkbox"/>                        | <input type="checkbox"/> | <input type="checkbox"/>    | <input type="checkbox"/>   | <input type="checkbox"/> | <input type="checkbox"/>    | <input type="checkbox"/>    | <input type="checkbox"/> | <input type="checkbox"/>       | <input type="checkbox"/>    | <input type="checkbox"/> | <input type="checkbox"/> | <input type="checkbox"/> | <input type="checkbox"/> | <input type="checkbox"/> |
| Lentils                     | <input type="checkbox"/>                        | <input type="checkbox"/> | <input type="checkbox"/>    | <input type="checkbox"/>   | <input type="checkbox"/> | <input type="checkbox"/>    | <input type="checkbox"/>    | <input type="checkbox"/> | <input type="checkbox"/>       | <input type="checkbox"/>    | <input type="checkbox"/> | <input type="checkbox"/> | <input type="checkbox"/> | <input type="checkbox"/> | <input type="checkbox"/> |
| Beans                       | <input type="checkbox"/>                        | <input type="checkbox"/> | <input type="checkbox"/>    | <input type="checkbox"/>   | <input type="checkbox"/> | <input type="checkbox"/>    | <input type="checkbox"/>    | <input type="checkbox"/> | <input type="checkbox"/>       | <input type="checkbox"/>    | <input type="checkbox"/> | <input type="checkbox"/> | <input type="checkbox"/> | <input type="checkbox"/> | <input type="checkbox"/> |
| Corn                        | <input type="checkbox"/>                        | <input type="checkbox"/> | <input type="checkbox"/>    | <input type="checkbox"/>   | <input type="checkbox"/> | <input type="checkbox"/>    | <input type="checkbox"/>    | <input type="checkbox"/> | <input type="checkbox"/>       | <input type="checkbox"/>    | <input type="checkbox"/> | <input type="checkbox"/> | <input type="checkbox"/> | <input type="checkbox"/> | <input type="checkbox"/> |
| Asparagus                   | <input type="checkbox"/>                        | <input type="checkbox"/> | <input type="checkbox"/>    | <input type="checkbox"/>   | <input type="checkbox"/> | <input type="checkbox"/>    | <input type="checkbox"/>    | <input type="checkbox"/> | <input type="checkbox"/>       | <input type="checkbox"/>    | <input type="checkbox"/> | <input type="checkbox"/> | <input type="checkbox"/> | <input type="checkbox"/> | <input type="checkbox"/> |
| Sweet potato                | <input type="checkbox"/>                        | <input type="checkbox"/> | <input type="checkbox"/>    | <input type="checkbox"/>   | <input type="checkbox"/> | <input type="checkbox"/>    | <input type="checkbox"/>    | <input type="checkbox"/> | <input type="checkbox"/>       | <input type="checkbox"/>    | <input type="checkbox"/> | <input type="checkbox"/> | <input type="checkbox"/> | <input type="checkbox"/> | <input type="checkbox"/> |
| Eggplant                    | <input type="checkbox"/>                        | <input type="checkbox"/> | <input type="checkbox"/>    | <input type="checkbox"/>   | <input type="checkbox"/> | <input type="checkbox"/>    | <input type="checkbox"/>    | <input type="checkbox"/> | <input type="checkbox"/>       | <input type="checkbox"/>    | <input type="checkbox"/> | <input type="checkbox"/> | <input type="checkbox"/> | <input type="checkbox"/> | <input type="checkbox"/> |
| Artichoke                   | <input type="checkbox"/>                        | <input type="checkbox"/> | <input type="checkbox"/>    | <input type="checkbox"/>   | <input type="checkbox"/> | <input type="checkbox"/>    | <input type="checkbox"/>    | <input type="checkbox"/> | <input type="checkbox"/>       | <input type="checkbox"/>    | <input type="checkbox"/> | <input type="checkbox"/> | <input type="checkbox"/> | <input type="checkbox"/> | <input type="checkbox"/> |
| Radishes                    | <input type="checkbox"/>                        | <input type="checkbox"/> | <input type="checkbox"/>    | <input type="checkbox"/>   | <input type="checkbox"/> | <input type="checkbox"/>    | <input type="checkbox"/>    | <input type="checkbox"/> | <input type="checkbox"/>       | <input type="checkbox"/>    | <input type="checkbox"/> | <input type="checkbox"/> | <input type="checkbox"/> | <input type="checkbox"/> | <input type="checkbox"/> |
| Apple                       | <input type="checkbox"/>                        | <input type="checkbox"/> | <input type="checkbox"/>    | <input type="checkbox"/>   | <input type="checkbox"/> | <input type="checkbox"/>    | <input type="checkbox"/>    | <input type="checkbox"/> | <input type="checkbox"/>       | <input type="checkbox"/>    | <input type="checkbox"/> | <input type="checkbox"/> | <input type="checkbox"/> | <input type="checkbox"/> | <input type="checkbox"/> |
| Orange                      | <input type="checkbox"/>                        | <input type="checkbox"/> | <input type="checkbox"/>    | <input type="checkbox"/>   | <input type="checkbox"/> | <input type="checkbox"/>    | <input type="checkbox"/>    | <input type="checkbox"/> | <input type="checkbox"/>       | <input type="checkbox"/>    | <input type="checkbox"/> | <input type="checkbox"/> | <input type="checkbox"/> | <input type="checkbox"/> | <input type="checkbox"/> |
| Pear                        | <input type="checkbox"/>                        | <input type="checkbox"/> | <input type="checkbox"/>    | <input type="checkbox"/>   | <input type="checkbox"/> | <input type="checkbox"/>    | <input type="checkbox"/>    | <input type="checkbox"/> | <input type="checkbox"/>       | <input type="checkbox"/>    | <input type="checkbox"/> | <input type="checkbox"/> | <input type="checkbox"/> | <input type="checkbox"/> | <input type="checkbox"/> |
| Grapes                      | <input type="checkbox"/>                        | <input type="checkbox"/> | <input type="checkbox"/>    | <input type="checkbox"/>   | <input type="checkbox"/> | <input type="checkbox"/>    | <input type="checkbox"/>    | <input type="checkbox"/> | <input type="checkbox"/>       | <input type="checkbox"/>    | <input type="checkbox"/> | <input type="checkbox"/> | <input type="checkbox"/> | <input type="checkbox"/> | <input type="checkbox"/> |
| Apricots                    | <input type="checkbox"/>                        | <input type="checkbox"/> | <input type="checkbox"/>    | <input type="checkbox"/>   | <input type="checkbox"/> | <input type="checkbox"/>    | <input type="checkbox"/>    | <input type="checkbox"/> | <input type="checkbox"/>       | <input type="checkbox"/>    | <input type="checkbox"/> | <input type="checkbox"/> | <input type="checkbox"/> | <input type="checkbox"/> | <input type="checkbox"/> |
| Tangerines                  | <input type="checkbox"/>                        | <input type="checkbox"/> | <input type="checkbox"/>    | <input type="checkbox"/>   | <input type="checkbox"/> | <input type="checkbox"/>    | <input type="checkbox"/>    | <input type="checkbox"/> | <input type="checkbox"/>       | <input type="checkbox"/>    | <input type="checkbox"/> | <input type="checkbox"/> | <input type="checkbox"/> | <input type="checkbox"/> | <input type="checkbox"/> |
| Pinneapple                  | <input type="checkbox"/>                        | <input type="checkbox"/> | <input type="checkbox"/>    | <input type="checkbox"/>   | <input type="checkbox"/> | <input type="checkbox"/>    | <input type="checkbox"/>    | <input type="checkbox"/> | <input type="checkbox"/>       | <input type="checkbox"/>    | <input type="checkbox"/> | <input type="checkbox"/> | <input type="checkbox"/> | <input type="checkbox"/> | <input type="checkbox"/> |
| Peach                       | <input type="checkbox"/>                        | <input type="checkbox"/> | <input type="checkbox"/>    | <input type="checkbox"/>   | <input type="checkbox"/> | <input type="checkbox"/>    | <input type="checkbox"/>    | <input type="checkbox"/> | <input type="checkbox"/>       | <input type="checkbox"/>    | <input type="checkbox"/> | <input type="checkbox"/> | <input type="checkbox"/> | <input type="checkbox"/> | <input type="checkbox"/> |
| Nectarines                  | <input type="checkbox"/>                        | <input type="checkbox"/> | <input type="checkbox"/>    | <input type="checkbox"/>   | <input type="checkbox"/> | <input type="checkbox"/>    | <input type="checkbox"/>    | <input type="checkbox"/> | <input type="checkbox"/>       | <input type="checkbox"/>    | <input type="checkbox"/> | <input type="checkbox"/> | <input type="checkbox"/> | <input type="checkbox"/> | <input type="checkbox"/> |
| Banana                      | <input type="checkbox"/>                        | <input type="checkbox"/> | <input type="checkbox"/>    | <input type="checkbox"/>   | <input type="checkbox"/> | <input type="checkbox"/>    | <input type="checkbox"/>    | <input type="checkbox"/> | <input type="checkbox"/>       | <input type="checkbox"/>    | <input type="checkbox"/> | <input type="checkbox"/> | <input type="checkbox"/> | <input type="checkbox"/> | <input type="checkbox"/> |
| Plums                       | <input type="checkbox"/>                        | <input type="checkbox"/> | <input type="checkbox"/>    | <input type="checkbox"/>   | <input type="checkbox"/> | <input type="checkbox"/>    | <input type="checkbox"/>    | <input type="checkbox"/> | <input type="checkbox"/>       | <input type="checkbox"/>    | <input type="checkbox"/> | <input type="checkbox"/> | <input type="checkbox"/> | <input type="checkbox"/> | <input type="checkbox"/> |
| Cherries                    | <input type="checkbox"/>                        | <input type="checkbox"/> | <input type="checkbox"/>    | <input type="checkbox"/>   | <input type="checkbox"/> | <input type="checkbox"/>    | <input type="checkbox"/>    | <input type="checkbox"/> | <input type="checkbox"/>       | <input type="checkbox"/>    | <input type="checkbox"/> | <input type="checkbox"/> | <input type="checkbox"/> | <input type="checkbox"/> | <input type="checkbox"/> |
| Strawberries                | <input type="checkbox"/>                        | <input type="checkbox"/> | <input type="checkbox"/>    | <input type="checkbox"/>   | <input type="checkbox"/> | <input type="checkbox"/>    | <input type="checkbox"/>    | <input type="checkbox"/> | <input type="checkbox"/>       | <input type="checkbox"/>    | <input type="checkbox"/> | <input type="checkbox"/> | <input type="checkbox"/> | <input type="checkbox"/> | <input type="checkbox"/> |
| Blueberry                   | <input type="checkbox"/>                        | <input type="checkbox"/> | <input type="checkbox"/>    | <input type="checkbox"/>   | <input type="checkbox"/> | <input type="checkbox"/>    | <input type="checkbox"/>    | <input type="checkbox"/> | <input type="checkbox"/>       | <input type="checkbox"/>    | <input type="checkbox"/> | <input type="checkbox"/> | <input type="checkbox"/> | <input type="checkbox"/> | <input type="checkbox"/> |
| Melon                       | <input type="checkbox"/>                        | <input type="checkbox"/> | <input type="checkbox"/>    | <input type="checkbox"/>   | <input type="checkbox"/> | <input type="checkbox"/>    | <input type="checkbox"/>    | <input type="checkbox"/> | <input type="checkbox"/>       | <input type="checkbox"/>    | <input type="checkbox"/> | <input type="checkbox"/> | <input type="checkbox"/> | <input type="checkbox"/> | <input type="checkbox"/> |
| Blackberry                  | <input type="checkbox"/>                        | <input type="checkbox"/> | <input type="checkbox"/>    | <input type="checkbox"/>   | <input type="checkbox"/> | <input type="checkbox"/>    | <input type="checkbox"/>    | <input type="checkbox"/> | <input type="checkbox"/>       | <input type="checkbox"/>    | <input type="checkbox"/> | <input type="checkbox"/> | <input type="checkbox"/> | <input type="checkbox"/> | <input type="checkbox"/> |
| Cranberry                   | <input type="checkbox"/>                        | <input type="checkbox"/> | <input type="checkbox"/>    | <input type="checkbox"/>   | <input type="checkbox"/> | <input type="checkbox"/>    | <input type="checkbox"/>    | <input type="checkbox"/> | <input type="checkbox"/>       | <input type="checkbox"/>    | <input type="checkbox"/> | <input type="checkbox"/> | <input type="checkbox"/> | <input type="checkbox"/> | <input type="checkbox"/> |
| Figs                        | <input type="checkbox"/>                        | <input type="checkbox"/> | <input type="checkbox"/> </ |                            |                          |                             |                             |                          |                                |                             |                          |                          |                          |                          |                          |
